# Supplementary material for: The potential of dynamic 99mTc-sestamibi cadmium zinc telluride-single-photon emission computed tomography camera assessing myocardial flow reserve in patients with heart failure with preserved ejection fraction
Source: PubMed Central journal article supplement — Eur Heart J Open. 2023 Mar 14;3(2):oead028. doi: 10.1093/ehjopen/oead028 (PMC10072870; doi:10.1093/ehjopen/oead028), 2023-03-14
Supplement: oead028_supplementary_data.pdf [file oead028_supplementary_data.pdf]

# Supplement 1

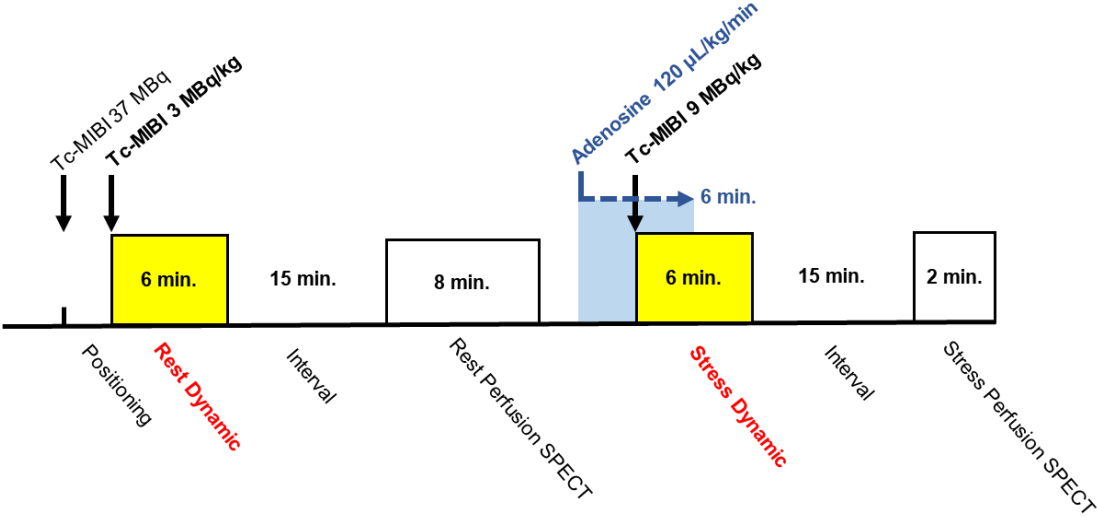

Supplement 1. Timeline of SPECT acquisition

# Supplement 2

a.

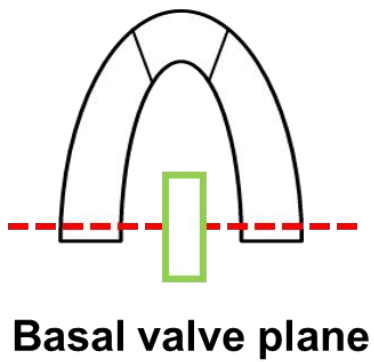

b.

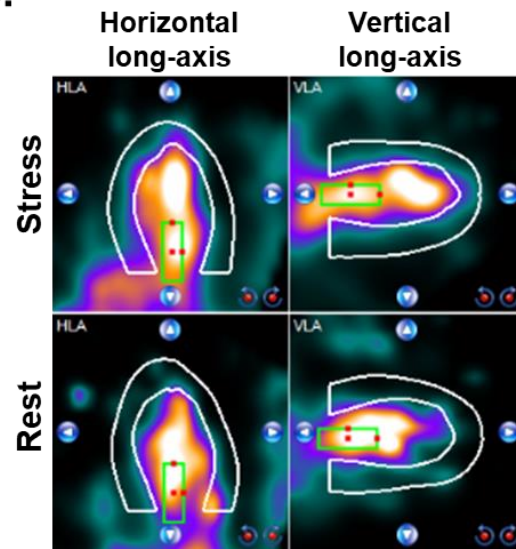

## Supplement 2. Positioning of ROI in the blood pool

a. Schematic representation of the region of interest (ROI) (green box) in the blood pool. A 2 pixel-wide x 6 pixel-long ROI was positioned at the basal valve plane (within the LV and LA blood pool). b. Typical example of an ROI in a blood pool.
